# Supplementary material for: DNA methylation biomarkers for diagnosis of primary liver cancer and distinguishing hepatocellular carcinoma from intrahepatic cholangiocarcinoma
Source: publisher site journal article supplement (doi:10.18632/aging.203249), 2021-07-08
Supplement: Supplementary file [file aging-v13i13-203249-supplementary-material-SD4.pdf]

## SUPPLEMENTARY TABLE

**Supplementary Table 5. Results of differential analysis between normal samples and ICC samples.**

| Gene        | Normal mean | ICC mean   | logFC    | P value  | Adjust P | cor      | cor P value |
|-------------|-------------|------------|----------|----------|----------|----------|-------------|
| NRSN2       | 0.265258974 | 0.12171362 | -1.12391 | 3.93E-06 | 0.000573 | -0.60727 | 0.000373    |
| PATZ1       | 0.65938025  | 0.34791105 | -0.92239 | 1.64E-07 | 2.39E-05 | -0.60113 | 0.000443    |
| SPP1        | 0.605498782 | 0.3271744  | -0.88806 | 0.000183 | 0.026664 | -0.59963 | 0.000462    |
| C6orf223    | 0.572928919 | 0.35862386 | -0.67588 | 3.93E-06 | 0.000573 | -0.58952 | 0.000608    |
| AHNAK2      | 0.790859731 | 0.58680545 | -0.43054 | 0.000202 | 0.029526 | -0.70736 | 1.24E-05    |
| M1AP        | 0.538616569 | 0.72546894 | 0.429655 | 2.74E-06 | 0.0004   | -0.62173 | 0.000245    |
| HORMAD2     | 0.438715914 | 0.60332508 | 0.459649 | 0.000137 | 0.020002 | -0.82221 | 2.51E-08    |
| SERPINA10   | 0.306045445 | 0.42803955 | 0.483998 | 0.000107 | 0.015668 | -0.6095  | 0.00035     |
| ZYG11A      | 0.316567749 | 0.46899738 | 0.567066 | 0.000182 | 0.026642 | -0.57065 | 0.000992    |
| FES         | 0.400817591 | 0.60842559 | 0.602135 | 1.89E-05 | 0.002765 | -0.78972 | 2.12E-07    |
| TMEM176A    | 0.228656995 | 0.34725144 | 0.602796 | 2.74E-06 | 0.0004   | -0.62337 | 0.000233    |
| ADORA2A-AS1 | 0.349828035 | 0.57527269 | 0.7176   | 7.69E-06 | 0.001123 | -0.58009 | 0.000779    |
| EMP3        | 0.354403029 | 0.58503871 | 0.723141 | 0.000202 | 0.029526 | -0.6061  | 0.000385    |
| KLF15       | 0.258977664 | 0.43466174 | 0.747065 | 5.37E-05 | 0.00784  | -0.65116 | 9.74E-05    |
| TAT         | 0.293132521 | 0.49681662 | 0.76116  | 5.56E-06 | 0.000812 | -0.63698 | 0.000154    |
| HPX         | 0.416278862 | 0.73742367 | 0.824943 | 1.84E-06 | 0.000269 | -0.71835 | 7.82E-06    |
| TF          | 0.263338122 | 0.46728678 | 0.827392 | 2.74E-06 | 0.0004   | -0.62542 | 0.000219    |
| A2M         | 0.249939542 | 0.48166613 | 0.94644  | 2.74E-06 | 0.0004   | -0.6927  | 2.22E-05    |
| DEPDC7      | 0.104488228 | 0.2085257  | 0.996885 | 1.06E-05 | 0.001541 | -0.59664 | 0.000501    |
| RRN3P1      | 0.147728654 | 0.32820824 | 1.151662 | 3.25E-05 | 0.004747 | -0.68214 | 3.30E-05    |
| IGF1        | 0.286284071 | 0.64556513 | 1.173115 | 1.84E-06 | 0.000269 | -0.71957 | 7.42E-06    |
| BNC1        | 0.24159043  | 0.54522145 | 1.174279 | 2.74E-06 | 0.0004   | -0.59823 | 0.00048     |
| FUOM        | 0.150583042 | 0.34631798 | 1.201538 | 2.74E-06 | 0.0004   | -0.5788  | 0.000806    |
| AF186192.1  | 0.173482553 | 0.40342318 | 1.217503 | 3.25E-05 | 0.004747 | -0.60556 | 0.000391    |
| ACSL5       | 0.161039038 | 0.40662332 | 1.336282 | 4.09E-08 | 5.97E-06 | -0.60973 | 0.000348    |
| ZNF582      | 0.124543989 | 0.32179253 | 1.369475 | 0.000133 | 0.019477 | -0.65413 | 8.83E-05    |
| HLX         | 0.106896714 | 0.33317347 | 1.640056 | 1.06E-05 | 0.001541 | -0.60329 | 0.000417    |
| CFH         | 0.04875832  | 0.19137859 | 1.972709 | 0.000247 | 0.036035 | -0.58316 | 0.000719    |

Relating to Figure 4C.
