# Supplementary material for: DNA methylation biomarkers for diagnosis of primary liver cancer and distinguishing hepatocellular carcinoma from intrahepatic cholangiocarcinoma
Source: Aging (Albany NY). 2021 Jul 8;13(13):17592–606. doi: 10.18632/aging.203249 (PMC8312421; doi:10.18632/aging.203249)
Supplement: Supplementary Table 1 [file aging-13-203249-s001.xlsx]

## Sheet: Sheet1
Supplementary Table 1. Distribution of differentially methylated sites and genes in HCC and ICC. Relating to Figure 1.
Number of Cpgs (A)	Island	N_Shelf	N_Shore	S_Shelf	S_Shore		Number of genes (B)	Island	N_Shelf	N_Shore	S_Shelf	S_Shore		Number of Cpgs (C)	TSS1500	TSS200	5'UTR	1stExon	Body	3'UTR		Number of genes (D)	TSS1500	TSS200	5UTR	1stExon	Body	3UTR
Upregulated in HCC	6519	52	721	31	461		Upregulated in HCC	1849	12	153	7	102		Upregulated in HCC	1199	1493	915	849	1802	116		Upregulated in HCC	395	448	356	351	682	42
Downregulated in HCC	287	133	290	140	240		Downregulated in HCC	148	30	112	22	107		Downregulated in HCC	381	228	216	152	901	93		Downregulated in HCC	239	135	109	101	365	52
Number of Cpgs (E)	Island	N_Shelf	N_Shore	S_Shelf	S_Shore		Number of genes (F)	Island	N_Shelf	N_Shore	S_Shelf	S_Shore		Number of Cpgs (G)	TSS1500	TSS200	5UTR	1stExon	Body	3UTR		Number of genes (H)	TSS1500	TSS200	5UTR	1stExon	Body	3UTR
Upregulated in ICC	21505	352	5009	280	3374		Upregulated in ICC	3708	53	983	40	769		Upregulated in ICC	5971	5304	3684	2698	7131	420		Upregulated in ICC	1585	1134	1016	692	1691	88
Downregulated in ICC	295	40	137	26	114		Downregulated in ICC	104	14	66	8	51		Downregulated in ICC	115	93	124	57	411	28		Downregulated in ICC	50	39	56	21	191	17
