# Supplementary material for: DNA methylation biomarkers for diagnosis of primary liver cancer and distinguishing hepatocellular carcinoma from intrahepatic cholangiocarcinoma
Source: Aging (Albany NY). 2021 Jul 8;13(13):17592–606. doi: 10.18632/aging.203249 (PMC8312421; doi:10.18632/aging.203249)
Supplement: Supplementary Table 4 [file aging-13-203249-s003.xlsx]

## Sheet: Sheet1
Supplementary Table 4. Results of differential analysis between normal samples and HCC samples. Relating to Figure 4A.
Gene	NormalMean	HCCMean	logFC	pValue	adjustP	cor	corPavlue
COX7B2	0.257506	0.152114	-0.759456	1.01231e-17	3.99862e-15	-0.359336	1.55358e-12
PES1P1	0.653075	0.428754	-0.607097	2.12877e-13	8.40864e-11	-0.424898	2.175e-17
RABGGTB	0.485356	0.343601	-0.498308	1.81056e-11	7.15172e-09	-0.334504	5.76915e-11
KIAA1143	0.179739	0.130162	-0.465594	8.87641e-09	3.50618e-06	-0.550026	3.6094e-30
SVIL-AS1	0.240167	0.221338	-0.117788	7.92162e-05	0.0312904	-0.515928	3.78409e-26
DGKZ	0.466779	0.521254	0.159248	1.27094e-07	5.0202e-05	-0.345838	1.15285e-11
KRBA1	0.529444	0.618388	0.224035	3.34456e-16	1.3211e-13	-0.321686	3.29824e-10
GSTP1	0.291201	0.342519	0.234172	1.13633e-06	0.00044885	-0.395277	4.61787e-15
DBNDD2	0.303902	0.379351	0.31993	1.60168e-09	6.32663e-07	-0.381464	4.70556e-14
QSOX1	0.293955	0.368408	0.32571	1.52492e-08	6.02345e-06	-0.361982	1.03707e-12
B3GALNT1	0.295305	0.375025	0.34478	3.57706e-05	0.0141294	-0.413233	1.91184e-16
SNHG15	0.220148	0.285333	0.374175	8.93654e-06	0.00352993	-0.439048	1.38705e-18
PLEKHH2	0.207496	0.276897	0.416262	8.98781e-09	3.55018e-06	-0.338927	3.10131e-11
MYCBPAP	0.379396	0.509201	0.42453	1.41636e-08	5.59461e-06	-0.335312	5.15437e-11
ZNF69	0.122938	0.16766	0.447603	1.62297e-10	6.41074e-08	-0.317632	5.6292e-10
MARVELD1	0.350282	0.480409	0.455744	5.78946e-13	2.28684e-10	-0.622182	2.20166e-40
SERP2	0.314387	0.431271	0.456056	2.02111e-08	7.98338e-06	-0.506561	4.02781e-25
ISYNA1	0.309457	0.424523	0.456103	9.0941e-10	3.59217e-07	-0.472715	1.15695e-21
AKR1E2	0.394715	0.546057	0.46824	3.59638e-20	1.42057e-17	-0.412228	2.29665e-16
NRSN2	0.213112	0.29658	0.47681	4.89155e-05	0.0193216	-0.671497	4.67176e-49
SLC9A3R2	0.311105	0.438932	0.496593	2.50695e-20	9.90245e-18	-0.329095	1.21605e-10
C17orf67	0.202373	0.286708	0.502564	6.67179e-08	2.63536e-05	-0.337282	3.91102e-11
ZSCAN18	0.232676	0.331898	0.512419	5.63898e-16	2.2274e-13	-0.473447	9.83051e-22
CCNI2	0.265256	0.378979	0.514735	3.11874e-16	1.2319e-13	-0.351803	4.81045e-12
MBOAT2	0.182037	0.266107	0.547776	1.56718e-09	6.19037e-07	-0.446473	3.1057e-19
C6orf99	0.26513	0.38966	0.555513	1.38755e-08	5.48082e-06	-0.572671	4.18273e-33
SECTM1	0.338683	0.500045	0.562124	7.83327e-12	3.09414e-09	-0.319763	4.25419e-10
ZNF418	0.182102	0.270231	0.569452	3.22243e-05	0.0127286	-0.536072	1.8122e-28
ZNF577	0.296864	0.443964	0.580639	6.00036e-08	2.37014e-05	-0.558273	3.26751e-31
ZNF135	0.283115	0.425036	0.586196	6.56955e-09	2.59497e-06	-0.436044	2.51511e-18
SGCB	0.155659	0.234176	0.589203	1.79595e-08	7.09402e-06	-0.367329	4.53027e-13
IFITM1	0.264002	0.399443	0.597442	2.39613e-10	9.46469e-08	-0.593876	4.54917e-36
LIME1	0.21558	0.328503	0.607685	3.72607e-07	0.00014718	-0.493195	1.03968e-23
DYDC1	0.235637	0.361301	0.616635	3.03788e-12	1.19996e-09	-0.358556	1.74886e-12
RASL12	0.328777	0.506175	0.622525	6.99535e-12	2.76316e-09	-0.357975	1.90987e-12
FAHD2B	0.112225	0.173266	0.626599	8.50432e-07	0.000335921	-0.377202	9.42378e-14
LAG3	0.362233	0.559938	0.628347	3.89035e-20	1.53669e-17	-0.32768	1.47427e-10
FES	0.339107	0.525486	0.631909	8.89919e-12	3.51518e-09	-0.583008	1.59927e-34
SLC13A5	0.203819	0.316601	0.635376	7.78168e-15	3.07376e-12	-0.392949	6.88171e-15
GPX7	0.174477	0.276745	0.665521	9.32436e-06	0.00368312	-0.56452	5.06223e-32
INPP5B	0.0898406	0.14353	0.675916	0.000123839	0.0489165	-0.433843	3.87571e-18
METTL24	0.252648	0.412745	0.70812	1.81309e-07	7.16172e-05	-0.466132	4.92584e-21
UCP2	0.207215	0.341421	0.720421	1.12876e-13	4.45861e-11	-0.34731	9.30741e-12
ZNF701	0.226831	0.375794	0.728326	6.24111e-08	2.46524e-05	-0.519013	1.70893e-26
ZNF233	0.188393	0.315031	0.741752	9.74685e-07	0.000385	-0.484384	8.20756e-23
CTHRC1	0.226863	0.379983	0.744116	5.9751e-06	0.00236017	-0.354458	3.24083e-12
LY75	0.221166	0.372796	0.753254	1.07764e-12	4.25666e-10	-0.380999	5.07836e-14
TSPY26P	0.313518	0.529321	0.755593	3.5895e-10	1.41785e-07	-0.500417	1.82707e-24
TRIM17	0.191033	0.322945	0.75747	3.50754e-17	1.38548e-14	-0.346035	1.12034e-11
ZNF502	0.165759	0.283886	0.776223	1.03354e-09	4.08248e-07	-0.553692	1.2511e-30
DCDC2	0.232917	0.39923	0.777406	3.71416e-08	1.46709e-05	-0.383404	3.41854e-14
RBP1	0.173132	0.297707	0.782018	5.21148e-09	2.05853e-06	-0.357917	1.92665e-12
ZNF83	0.10108	0.175077	0.792499	1.32579e-07	5.23688e-05	-0.465648	5.47239e-21
GNPDA2	0.0686527	0.121803	0.827157	2.66e-05	0.010507	-0.348144	8.24142e-12
MTHFD2	0.209167	0.376719	0.848837	1.42144e-15	5.6147e-13	-0.551562	2.31917e-30
GNB4	0.168706	0.305175	0.855128	1.64428e-20	6.49492e-18	-0.408658	4.38282e-16
RAB31	0.158268	0.286363	0.855473	2.97652e-16	1.17573e-13	-0.408034	4.903e-16
GNG4	0.141024	0.256435	0.862649	1.03576e-06	0.000409124	-0.320455	3.88278e-10
NSUN7	0.217789	0.396131	0.863044	1.42643e-10	5.63439e-08	-0.494523	7.57572e-24
DKK3	0.21474	0.391732	0.867273	3.02666e-18	1.19553e-15	-0.35405	3.44469e-12
EID3	0.260748	0.478469	0.875769	2.21002e-08	8.72959e-06	-0.407944	4.98325e-16
ZNF287	0.108536	0.200325	0.884171	4.80617e-07	0.000189844	-0.48613	5.47665e-23
NXPE3	0.184767	0.345456	0.902797	1.2048e-16	4.75894e-14	-0.373804	1.62753e-13
ZNF879	0.105539	0.19989	0.921427	2.26656e-07	8.95289e-05	-0.499964	2.04034e-24
ZNF568	0.0852296	0.161587	0.922886	1.15369e-09	4.55708e-07	-0.475013	6.92718e-22
CCNJ	0.206739	0.405746	0.972763	6.01695e-10	2.37669e-07	-0.618276	9.21129e-40
SPINT2	0.201884	0.397828	0.978619	1.70282e-12	6.72612e-10	-0.580185	3.94499e-34
RNF135	0.176714	0.353013	0.99831	3.8847e-17	1.53446e-14	-0.591182	1.11343e-35
FCHSD1	0.181027	0.362057	1.00001	1.62821e-08	6.43144e-06	-0.527971	1.62129e-27
NOVA1	0.0804703	0.162755	1.01617	3.53682e-13	1.39705e-10	-0.329047	1.22402e-10
ZNF454	0.131389	0.270614	1.0424	2.50795e-10	9.90641e-08	-0.332415	7.7075e-11
RPL39L	0.105039	0.219681	1.06449	1.94101e-06	0.000766699	-0.377879	8.44478e-14
BVES	0.156365	0.34112	1.12536	1.13415e-14	4.4799e-12	-0.349303	6.954e-12
FBXL2	0.0800755	0.174867	1.12683	5.32644e-11	2.10394e-08	-0.335048	5.34817e-11
XKR6	0.163884	0.361622	1.1418	1.82005e-16	7.18921e-14	-0.378845	7.2185e-14
ZNF471	0.0969473	0.219061	1.17606	1.23722e-07	4.88701e-05	-0.462479	1.08576e-20
GRHL2	0.21818	0.497874	1.19026	6.77518e-17	2.6762e-14	-0.425004	2.13154e-17
ZNF43	0.086755	0.198147	1.19156	1.20898e-07	4.77548e-05	-0.510664	1.44243e-25
ZNF391	0.0717084	0.169325	1.23959	1.02655e-08	4.05486e-06	-0.446662	2.98775e-19
ZNF790-AS1	0.0690795	0.16394	1.24684	5.86035e-08	2.31484e-05	-0.494488	7.63982e-24
LDHB	0.139516	0.333868	1.25884	1.17207e-17	4.62967e-15	-0.390924	9.71166e-15
ZNF880	0.0618802	0.148928	1.26706	1.53093e-12	6.04717e-10	-0.371838	2.22624e-13
ZNF382	0.0948683	0.237083	1.3214	2.0518e-05	0.00810461	-0.61381	4.61958e-39
TAL1	0.110455	0.27818	1.33256	4.47079e-18	1.76596e-15	-0.327143	1.58574e-10
EPHX3	0.165858	0.421227	1.34465	3.95488e-21	1.56218e-18	-0.372526	1.99553e-13
USP44	0.211537	0.53783	1.34624	2.60633e-21	1.0295e-18	-0.386768	1.95471e-14
STMN3	0.0734617	0.194863	1.4074	2.22018e-13	8.76972e-11	-0.338446	3.31942e-11
FAR1	0.111162	0.313059	1.49378	3.14152e-18	1.2409e-15	-0.427743	1.26347e-17
SLC25A36	0.08219	0.234034	1.50969	4.42933e-11	1.74959e-08	-0.490705	1.87549e-23
