# Supplementary material for: DNA methylation biomarkers for diagnosis of primary liver cancer and distinguishing hepatocellular carcinoma from intrahepatic cholangiocarcinoma
Source: Aging (Albany NY). 2021 Jul 8;13(13):17592–606. doi: 10.18632/aging.203249 (PMC8312421; doi:10.18632/aging.203249)
Supplement: Supplementary Table 6 [file aging-13-203249-s005.xlsx]

## Sheet: Sheet1
Supplementary Table 6. Clinical information of HCC patients. Relating to Figure 6A.
Id	Cluster	Age	Gender	Stage	T	N	M	Grade	Survival time	Survival state
TCGA-2Y-A9H0	2	<=60	Male	Stage III	T3	N0	M0	G1	3675	0
TCGA-5C-A9VG	1	<=60	Male	Stage II	T2	N0	M0	G2	328	0
TCGA-5C-A9VH	1	＞60	Male	Stage I	T1	N0	M0	G2	322	0
TCGA-5R-AA1C	3	<=60	Male	Stage II	T2	N0	M0	G2	520	0
TCGA-5R-AA1D	2	<=60	Female	Stage III	T3	N0	M0	G3	449	0
TCGA-5R-AAAM	3	＞60	Female	Stage II	T2	N0	M0	G2	46	1
TCGA-BC-4072	5	＞60	Female	Stage III	T3	N0	M0	G3	1490	1
TCGA-BC-A3KG	5	＞60	Female	Stage II	T2	N0	M0	G3	680	0
TCGA-BC-A69I	1	＞60	Male	Stage I	T1	N0	M0	G1	387	0
TCGA-BC-A8YO	1	＞60	Female	Stage III	T4	N0	M0	G3	562	0
TCGA-BD-A3EP	6	＞60	Female	Stage I	T1	N0	M0	G2	409	0
TCGA-BW-A5NP	5	<=60	Female	Stage IV	T2	N0	M1	G3	0	0
TCGA-CC-5258	6	<=60	Male	Stage II	T2	N0	M0	G2	129	1
TCGA-CC-5259	6	<=60	Female	Stage III	T4	N0	M0	G2	250	0
TCGA-CC-5260	6	＞60	Female	Stage III	T4	N0	M0	G1	87	1
TCGA-CC-5261	6	<=60	Male	Stage II	T2	N0	M0	G2	97	1
TCGA-CC-5262	5	＞60	Male	Stage III	T4	N0	M0	G1	103	1
TCGA-CC-5263	6	<=60	Male	Stage III	T3	N0	M0	G1	129	1
TCGA-CC-5264	6	＞60	Male	Stage III	T3	N0	M0	G2	102	1
TCGA-CC-A123	6	<=60	Female	Stage III	T3	N0	M0	G1	219	0
TCGA-CC-A1HT	6	<=60	Male	Stage III	T3	N0	M0	G3	101	1
TCGA-CC-A3M9	6	<=60	Male	Stage III	T3	N0	M0	G3	300	1
TCGA-CC-A3MA	5	＞60	Male	Stage III	T3	N0	M0	G2	303	1
TCGA-CC-A3MB	6	<=60	Male	Stage III	T3	N0	M0	G1	315	1
TCGA-CC-A3MC	5	<=60	Male	Stage III	T3	N0	M0	G2	363	0
TCGA-CC-A5UC	2	＞60	Male	Stage III	T3	N0	M0	G3	347	1
TCGA-CC-A5UD	4	<=60	Male	Stage III	T3	N0	M0	G2	304	1
TCGA-CC-A5UE	6	<=60	Male	Stage III	T4	N0	M0	G2	272	1
TCGA-CC-A7IE	5	<=60	Male	Stage III	T3	N0	M0	G2	217	1
TCGA-CC-A7IF	5	<=60	Male	Stage III	T3	N0	M0	G1	649	1
TCGA-CC-A7IG	6	<=60	Male	Stage II	T2	N0	M0	G2	299	1
TCGA-CC-A7IH	5	<=60	Male	Stage III	T3	N0	M0	G1	365	0
TCGA-CC-A7II	4	<=60	Male	Stage III	T3	N0	M0	G3	399	0
TCGA-CC-A7IJ	6	<=60	Male	Stage II	T2	N0	M0	G3	382	0
TCGA-CC-A7IK	2	<=60	Male	Stage III	T3	N0	M0	G3	262	1
TCGA-CC-A7IL	5	＞60	Male	Stage III	T3	N0	M0	G1	278	1
TCGA-CC-A8HS	3	<=60	Male	Stage III	T3	N1	M0	G1	300	1
TCGA-CC-A8HT	2	＞60	Male	Stage III	T3	N0	M0	G2	140	1
TCGA-CC-A8HU	4	<=60	Female	Stage III	T3	N0	M0	G3	344	1
TCGA-CC-A8HV	3	<=60	Female	Stage II	T2	N0	M0	G2	279	1
TCGA-CC-A9FS	3	<=60	Male	Stage II	T2	N0	M0	G2	211	0
TCGA-CC-A9FU	3	<=60	Female	Stage III	T3	N0	M0	G2	0	0
TCGA-CC-A9FV	1	<=60	Male	Stage III	T3	N0	M0	G2	0	0
TCGA-CC-A9FW	4	＞60	Male	Stage III	T3	N0	M0	G2	248	0
TCGA-DD-A113	6	<=60	Female	Stage II	T2	N0	M0	G3	2425	0
TCGA-DD-A115	5	<=60	Male	Stage III	T3	N0	M0	G2	2542	1
TCGA-DD-A116	5	＞60	Male	Stage III	T3	N0	M0	G3	1622	1
TCGA-DD-A118	5	＞60	Female	Stage II	T2	N0	M0	G2	3437	0
TCGA-DD-A119	5	<=60	Male	Stage IV	T3	N0	M1	G3	223	1
TCGA-DD-A11A	6	＞60	Male	Stage I	T1	N0	M0	G3	79	0
TCGA-DD-A11B	5	＞60	Male	Stage I	T1	N0	M0	G2	14	1
TCGA-DD-A11C	6	＞60	Male	Stage I	T1	N0	M0	G3	662	0
TCGA-DD-A11D	5	<=60	Female	Stage I	T1	N0	M0	G2	1560	1
TCGA-DD-A1EA	5	＞60	Male	Stage II	T2	N0	M0	G2	2415	0
TCGA-DD-A1EB	5	＞60	Female	Stage I	T1	N0	M0	G2	2017	0
TCGA-DD-A1EC	5	<=60	Female	Stage I	T1	N0	M0	G3	602	0
TCGA-DD-A1ED	5	＞60	Male	Stage I	T1	N0	M0	G1	2301	0
TCGA-DD-A1EE	5	＞60	Male	Stage III	T3	N0	M0	G3	349	1
TCGA-DD-A1EF	5	<=60	Female	Stage I	T1	N0	M0	G3	394	1
TCGA-DD-A1EG	5	＞60	Male	Stage I	T1	N0	M0	G3	1372	1
TCGA-DD-A1EH	6	<=60	Male	Stage III	T3	N0	M0	G3	1495	0
TCGA-DD-A1EI	6	<=60	Male	Stage I	T1	N0	M0	G2	183	0
TCGA-DD-A1EJ	6	＞60	Female	Stage III	T1	N1	M0	G2	1005	1
TCGA-DD-A1EK	5	＞60	Female	Stage IV	T4	N0	M1	G2	558	1
TCGA-DD-A1EL	6	<=60	Male	Stage II	T2	N0	M0	G3	415	1
TCGA-DD-A39W	6	<=60	Female	Stage III	T3	N0	M0	G2	827	1
TCGA-DD-A3A1	5	＞60	Male	Stage III	T3	N0	M0	G2	233	1
TCGA-DD-A3A2	5	＞60	Female	Stage I	T1	N0	M0	G1	2131	1
TCGA-DD-A3A3	5	<=60	Male	Stage I	T1	N0	M0	G2	535	1
TCGA-DD-A3A4	6	<=60	Male	Stage III	T3	N0	M0	G3	612	1
TCGA-DD-A3A5	5	＞60	Female	Stage III	T3	N0	M0	G2	3125	1
TCGA-DD-A3A6	5	＞60	Female	Stage II	T2	N0	M0	G2	3258	1
TCGA-DD-A3A7	6	＞60	Male	Stage III	T3	N0	M0	G3	419	1
TCGA-DD-A3A8	5	＞60	Male	Stage II	T2	N0	M0	G2	11	1
TCGA-DD-A3A9	1	＞60	Female	Stage IV	T4	N0	M1	G2	931	1
TCGA-DD-A4NA	1	＞60	Female	Stage III	T2	N1	M0	G3	1008	0
TCGA-DD-A4ND	1	<=60	Female	Stage I	T1	N0	M0	G3	2746	0
TCGA-DD-A4NE	2	＞60	Female	Stage III	T3	N0	M0	G3	660	1
TCGA-DD-A4NF	2	＞60	Male	Stage I	T1	N0	M0	G2	942	0
TCGA-DD-A4NH	3	＞60	Female	Stage III	T3	N0	M0	G3	917	0
TCGA-DD-A4NJ	5	<=60	Female	Stage II	T2	N0	M0	G2	928	0
TCGA-DD-A4NK	3	＞60	Female	Stage III	T3	N0	M0	G2	1210	1
TCGA-DD-A4NL	2	<=60	Male	Stage I	T1	N0	M0	G1	1711	0
TCGA-DD-A4NN	2	<=60	Female	Stage I	T1	N0	M0	G3	899	1
TCGA-DD-A4NO	2	＞60	Male	Stage I	T1	N0	M0	G1	2245	0
TCGA-DD-A4NP	2	<=60	Male	Stage I	T1	N0	M0	G3	3308	0
TCGA-DD-A4NQ	3	<=60	Male	Stage II	T2	N0	M0	G3	373	1
TCGA-DD-A4NR	6	＞60	Female	Stage I	T1	N0	M0	G3	9	1
TCGA-DD-A4NS	5	＞60	Female	Stage I	T1	N0	M0	G2	2456	1
TCGA-DD-A4NV	2	＞60	Male	Stage III	T3	N0	M0	G1	2398	0
TCGA-DD-A73A	6	＞60	Male	Stage I	T1	N0	M0	G2	728	0
TCGA-DD-A73B	3	＞60	Female	Stage I	T1	N0	M0	G2	283	1
TCGA-DD-A73C	5	＞60	Female	Stage III	T3	N0	M0	G1	701	0
TCGA-DD-A73E	3	＞60	Male	Stage I	T1	N0	M0	G1	44	0
TCGA-DD-A73F	2	＞60	Female	Stage I	T1	N0	M0	G1	1085	0
TCGA-DD-A73G	2	＞60	Female	Stage I	T1	N0	M0	G3	3478	0
TCGA-DD-AAC8	4	＞60	Male	Stage I	T1	N0	M0	G3	16	1
TCGA-DD-AAC9	1	<=60	Male	Stage I	T1	N0	M0	G2	347	0
TCGA-DD-AACA	1	＞60	Male	Stage I	T1	N0	M0	G3	2301	0
TCGA-DD-AACB	4	＞60	Female	Stage I	T1	N0	M0	G3	2324	0
TCGA-DD-AACC	3	＞60	Male	Stage I	T1	N0	M0	G2	1685	1
TCGA-DD-AACD	3	<=60	Male	Stage I	T1	N0	M0	G4	381	1
TCGA-DD-AACE	1	＞60	Male	Stage I	T1	N0	M0	G3	2184	0
TCGA-DD-AACF	4	＞60	Male	Stage I	T1	N0	M0	G3	365	1
TCGA-DD-AACG	3	<=60	Male	Stage II	T2	N0	M0	G4	469	1
TCGA-DD-AACH	1	＞60	Male	Stage II	T2	N0	M0	G3	195	1
TCGA-DD-AACI	1	＞60	Male	Stage II	T2	N0	M0	G3	1618	0
TCGA-DD-AACJ	1	＞60	Male	Stage II	T2	N0	M0	G2	2102	0
TCGA-DD-AACK	1	＞60	Male	Stage I	T1	N0	M0	G2	9	0
TCGA-DD-AACL	3	＞60	Female	Stage I	T1	N0	M0	G3	107	1
TCGA-DD-AACN	3	<=60	Male	Stage I	T1	N0	M0	G3	1302	0
TCGA-DD-AACO	1	<=60	Male	Stage I	T1	N0	M0	G3	1876	0
TCGA-DD-AACP	4	＞60	Male	Stage I	T1	N0	M0	G3	415	0
TCGA-DD-AACQ	2	<=60	Male	Stage II	T2	N0	M0	G3	432	1
TCGA-DD-AACS	2	<=60	Male	Stage I	T1	N0	M0	G3	1804	0
TCGA-DD-AACT	1	＞60	Female	Stage I	T1	N0	M0	G2	1562	0
TCGA-DD-AACU	3	<=60	Male	Stage I	T1	N0	M0	G3	1567	0
TCGA-DD-AACV	3	<=60	Male	Stage I	T1	N0	M0	G3	1531	0
TCGA-DD-AACW	1	<=60	Male	Stage I	T1	N0	M0	G3	1424	0
TCGA-DD-AACX	1	＞60	Male	Stage II	T2	N0	M0	G3	170	0
TCGA-DD-AACY	1	＞60	Male	Stage I	T1	N0	M0	G3	1450	0
TCGA-DD-AACZ	3	＞60	Female	Stage I	T1	N0	M0	G4	171	1
TCGA-DD-AAD0	1	＞60	Female	Stage I	T1	N0	M0	G2	137	0
TCGA-DD-AAD1	7	<=60	Female	Stage I	T1	N0	M0	G4	564	0
TCGA-DD-AAD2	1	＞60	Male	Stage I	T1	N0	M0	G2	658	0
TCGA-DD-AAD3	1	<=60	Male	Stage I	T1	N0	M0	G2	1295	0
TCGA-DD-AAD5	1	<=60	Male	Stage I	T1	N0	M0	G3	1345	0
TCGA-DD-AAD6	1	＞60	Male	Stage III	T3	N0	M0	G3	672	0
TCGA-DD-AAD8	3	＞60	Female	Stage I	T1	N0	M0	G2	1219	0
TCGA-DD-AADA	1	＞60	Female	Stage I	T1	N0	M0	G3	1233	0
TCGA-DD-AADB	3	<=60	Male	Stage I	T1	N0	M0	G4	1242	0
TCGA-DD-AADC	4	<=60	Male	Stage I	T1	N0	M0	G3	425	1
TCGA-DD-AADD	4	<=60	Male	Stage I	T1	N0	M0	G4	1231	0
TCGA-DD-AADF	4	＞60	Female	Stage I	T1	N0	M0	G4	115	1
TCGA-DD-AADG	3	＞60	Male	Stage III	T3	N0	M0	G3	1145	0
TCGA-DD-AADI	1	<=60	Female	Stage I	T1	N0	M0	G3	1085	0
TCGA-DD-AADJ	1	＞60	Female	Stage I	T1	N0	M0	G3	1066	0
TCGA-DD-AADK	1	＞60	Female	Stage II	T2	N0	M0	G3	1049	0
TCGA-DD-AADL	1	<=60	Male	Stage I	T1	N0	M0	G4	636	0
TCGA-DD-AADM	1	<=60	Male	Stage II	T2	N0	M0	G3	12	1
TCGA-DD-AADO	2	<=60	Male	Stage I	T1	N0	M0	G3	453	0
TCGA-DD-AADP	3	<=60	Male	Stage I	T1	N0	M0	G3	458	0
TCGA-DD-AADQ	3	<=60	Male	Stage II	T2	N0	M0	G3	436	0
TCGA-DD-AADR	3	<=60	Male	Stage I	T1	N0	M0	G3	2028	0
TCGA-DD-AADS	1	＞60	Male	Stage I	T1	N0	M0	G2	474	0
TCGA-DD-AADU	1	<=60	Male	Stage II	T2	N0	M0	G3	554	0
TCGA-DD-AADV	3	<=60	Male	Stage I	T1	N0	M0	G3	574	0
TCGA-DD-AADW	1	<=60	Male	Stage I	T1	N0	M0	G3	587	0
TCGA-DD-AADY	1	<=60	Female	Stage I	T1	N0	M0	G2	555	0
TCGA-DD-AAE0	1	<=60	Female	Stage III	T3	N0	M0	G4	555	0
TCGA-DD-AAE1	3	<=60	Male	Stage I	T1	N0	M0	G3	552	0
TCGA-DD-AAE2	1	<=60	Male	Stage I	T1	N0	M0	G3	638	0
TCGA-DD-AAE3	4	<=60	Male	Stage I	T1	N0	M0	G2	566	0
TCGA-DD-AAE4	1	<=60	Female	Stage I	T1	N0	M0	G1	608	0
TCGA-DD-AAE6	1	<=60	Female	Stage I	T1	N0	M0	G2	141	0
TCGA-DD-AAE7	1	＞60	Male	Stage I	T1	N0	M0	G2	644	0
TCGA-DD-AAE9	4	＞60	Male	Stage I	T1	N0	M0	G3	722	0
TCGA-DD-AAEA	3	＞60	Male	Stage I	T1	N0	M0	G3	575	0
TCGA-DD-AAEB	1	<=60	Male	Stage I	T1	N0	M0	G2	478	0
TCGA-DD-AAED	7	<=60	Male	Stage I	T1	N0	M0	G3	763	0
TCGA-DD-AAEE	1	<=60	Male	Stage I	T1	N0	M0	G4	810	0
TCGA-DD-AAEG	4	<=60	Female	Stage I	T1	N0	M0	G3	719	0
TCGA-DD-AAEH	1	＞60	Male	Stage I	T1	N0	M0	G2	784	0
TCGA-DD-AAEI	4	＞60	Male	Stage I	T1	N0	M0	G2	1531	0
TCGA-DD-AAEK	1	<=60	Male	Stage II	T2	N0	M0	G3	1067	0
TCGA-DD-AAVP	1	<=60	Male	Stage I	T1	N0	M0	G1	2752	0
TCGA-DD-AAVQ	1	<=60	Male	Stage I	T1	N0	M0	G2	2728	0
TCGA-DD-AAVR	1	<=60	Male	Stage I	T1	N0	M0	G2	2513	0
TCGA-DD-AAVS	1	<=60	Male	Stage I	T1	N0	M0	G2	1823	0
TCGA-DD-AAVU	4	<=60	Male	Stage II	T2	N0	M0	G2	2202	0
TCGA-DD-AAVV	1	<=60	Male	Stage II	T2	N0	M0	G3	2455	0
TCGA-DD-AAVW	1	<=60	Male	Stage I	T1	N0	M0	G2	2317	0
TCGA-DD-AAVX	3	<=60	Male	Stage II	T2	N0	M0	G2	1718	0
TCGA-DD-AAVY	1	<=60	Male	Stage III	T3	N0	M0	G2	1970	0
TCGA-DD-AAVZ	2	<=60	Male	Stage I	T1	N0	M0	G2	1900	0
TCGA-DD-AAW0	1	<=60	Male	Stage I	T1	N0	M0	G2	2015	0
TCGA-DD-AAW1	1	<=60	Male	Stage III	T3	N0	M0	G2	1989	0
TCGA-DD-AAW2	1	＞60	Male	Stage I	T1	N0	M0	G2	1855	0
TCGA-DD-AAW3	1	＞60	Male	Stage I	T1	N0	M0	G2	1633	0
TCGA-ED-A459	2	<=60	Male	Stage II	T2	N0	M0	G2	910	0
TCGA-ED-A4XI	2	<=60	Male	Stage II	T2	N0	M0	G3	819	0
TCGA-ED-A5KG	5	<=60	Female	Stage II	T2	N0	M0	G2	854	0
TCGA-ED-A66X	2	<=60	Male	Stage III	T3	N0	M0	G3	406	0
TCGA-ED-A66Y	6	<=60	Female	Stage III	T3	N0	M0	G3	296	1
TCGA-ED-A7XO	3	<=60	Male	Stage III	T3	N0	M0	G2	427	0
TCGA-ED-A7XP	2	<=60	Female	Stage II	T2	N0	M0	G3	400	0
TCGA-ED-A82E	1	<=60	Female	Stage III	T3	N0	M0	G2	408	0
TCGA-ED-A8O5	4	<=60	Female	Stage III	T3	N0	M0	G3	406	0
TCGA-ED-A8O6	3	<=60	Female	Stage III	T3	N0	M0	G3	56	1
TCGA-FV-A2QR	5	＞60	Male	Stage I	T1	N0	M0	G1	581	1
TCGA-G3-A25S	6	＞60	Male	Stage I	T1	N0	M0	G2	416	1
TCGA-G3-A25T	5	<=60	Female	Stage III	T3	N0	M0	G2	1553	0
TCGA-G3-A25U	5	＞60	Female	Stage I	T1	N0	M0	G3	1636	0
TCGA-G3-A25V	5	＞60	Male	Stage I	T1	N0	M0	G2	860	0
TCGA-G3-A25X	1	＞60	Male	Stage II	T2	N0	M0	G3	1779	0
TCGA-G3-A25Y	5	<=60	Female	Stage I	T1	N0	M0	G3	452	1
TCGA-G3-A25Z	5	<=60	Male	Stage I	T1	N0	M0	G2	655	0
TCGA-G3-A3CG	6	＞60	Male	Stage I	T1	N0	M0	G2	673	0
TCGA-G3-A3CH	5	<=60	Male	Stage III	T3	N0	M0	G2	780	0
TCGA-G3-A3CI	5	＞60	Male	Stage I	T1	N0	M0	G2	180	0
TCGA-G3-A3CJ	5	<=60	Male	Stage II	T2	N0	M0	G2	594	0
TCGA-G3-A3CK	5	＞60	Male	Stage I	T1	N0	M0	G2	585	0
TCGA-G3-A5SI	2	<=60	Male	Stage II	T2	N0	M0	G2	768	1
TCGA-G3-A6UC	5	＞60	Male	Stage III	T3	N0	M0	G2	671	0
TCGA-G3-AAUZ	2	<=60	Male	Stage I	T1	N0	M0	G2	480	0
TCGA-G3-AAV0	1	<=60	Male	Stage I	T1	N0	M0	G2	476	0
TCGA-G3-AAV1	5	<=60	Male	Stage III	T4	N0	M0	G3	359	1
TCGA-G3-AAV2	3	<=60	Male	Stage I	T1	N0	M0	G1	372	0
TCGA-G3-AAV3	3	<=60	Female	Stage II	T2	N0	M0	G2	412	0
TCGA-G3-AAV4	4	＞60	Female	Stage I	T1	N0	M0	G1	27	1
TCGA-G3-AAV5	1	＞60	Male	Stage II	T2	N0	M0	G2	354	0
TCGA-G3-AAV6	4	<=60	Female	Stage III	T3	N0	M0	G3	65	1
TCGA-G3-AAV7	4	<=60	Male	Stage II	T2	N0	M0	G2	361	0
TCGA-KR-A7K0	5	＞60	Male	Stage I	T1	N0	M0	G1	65	1
TCGA-KR-A7K7	6	＞60	Female	Stage II	T2	N0	M0	G1	951	0
TCGA-KR-A7K8	5	<=60	Male	Stage I	T1	N0	M0	G1	906	0
TCGA-LG-A9QD	1	＞60	Male	Stage III	T3	N0	M0	G2	366	0
TCGA-MI-A75C	3	＞60	Male	Stage I	T1	N0	M0	G3	291	0
TCGA-MI-A75E	2	＞60	Male	Stage III	T4	N0	M0	G2	507	0
TCGA-MI-A75G	3	＞60	Male	Stage II	T2	N0	M0	G2	698	0
TCGA-PD-A5DF	2	<=60	Female	Stage III	T4	N0	M0	G2	639	1
TCGA-RC-A6M3	6	<=60	Male	Stage II	T2	N0	M0	G3	0	0
TCGA-RC-A7S9	2	<=60	Female	Stage I	T1	N0	M0	G3	640	0
TCGA-RC-A7SB	2	<=60	Male	Stage II	T2	N0	M0	G2	588	0
TCGA-RC-A7SF	2	＞60	Male	Stage I	T1	N0	M0	G2	579	0
TCGA-RC-A7SH	2	<=60	Male	Stage II	T2	N0	M0	G3	468	0
TCGA-RC-A7SK	5	<=60	Male	Stage I	T1	N0	M0	G3	472	0
TCGA-RG-A7D4	6	＞60	Male	Stage II	T2	N0	M0	G2	1098	0
TCGA-XR-A8TD	1	<=60	Female	Stage III	T3	N0	M0	G3	1030	0
