# Supplementary material for: DNA methylation biomarkers for diagnosis of primary liver cancer and distinguishing hepatocellular carcinoma from intrahepatic cholangiocarcinoma
Source: Aging (Albany NY). 2021 Jul 8;13(13):17592–606. doi: 10.18632/aging.203249 (PMC8312421; doi:10.18632/aging.203249)
Supplement: Supplementary Table 7 [file aging-13-203249-s006.xlsx]

## Sheet: Sheet1
Supplementary Table 7. Clinical information of ICC patients. Relating to Figure 6C.
Id	Cluster	Age	Gender	Stage	T	N	M	Survival time	Survival state
GSM2389667	5	＞60	Female	Stage I	T1	N0	M0	1064	0
GSM2389668	6	＞60	Male	Stage I	T1	N0	M0	841	0
GSM2389671	4	＞60	Female	Stage I	T1	N0	M0	1129	0
GSM2389673	4	＞60	Female	Stage I	T1	N0	M0	1540	0
GSM2389675	1	<=60	Male	Stage I	T1	N0	M0	1381	1
GSM2389678	3	<=60	Female	Stage IV	T1	N0	M1	91	1
GSM2389680	5	<=60	Female	Stage I	T1	N0	M0	858	0
GSM2389681	5	<=60	Male	Stage III	T3	N0	M0	990	0
GSM2389682	5	<=60	Male	Stage I	T1	N0	M0	381	0
GSM2389683	5	<=60	Male	Stage III	T3	N0	M0	867	0
GSM2389685	2	<=60	Male	Stage IV	T4	N1	M0	157	1
GSM2389686	3	＞60	Female	Stage III	T3	N0	M0	232	0
GSM2389687	2	＞60	Male	Stage III	T3	N0	M0	64	1
GSM2389688	5	＞60	Female	Stage IV	T2	N1	M0	517	0
GSM2389689	2	＞60	Female	Stage III	T3	N0	M0	117	1
GSM2389690	5	＞60	Female	Stage IV	T1	N1	M0	1154	0
GSM2389692	5	＞60	Male	Stage I	T1	N0	M0	2848	0
GSM2389693	2	＞60	Female	Stage III	T3	N0	M0	177	1
GSM2389694	3	<=60	Female	Stage IV	T3	N1	M0	1868	1
GSM2389695	2	<=60	Male	Stage IV	T3	N1	M0	180	1
GSM2389696	2	＞60	Male	Stage III	T3	N0	M0	82	1
GSM2389697	3	<=60	Male	Stage III	T3	N0	M0	373	0
GSM2389698	2	<=60	Female	Stage IV	T3	N1	M0	945	1
GSM2389702	2	<=60	Female	Stage IV	T2	N1	M0	559	1
GSM2389705	2	<=60	Female	Stage III	T3	N0	M0	167	1
GSM2389707	5	＞60	Female	Stage IV	T3	N1	M0	1119	1
GSM2389709	5	<=60	Female	Stage II	T2	N0	M0	1111	0
GSM2389712	1	<=60	Female	Stage IV	T2	N1	M0	575	1
GSM2389715	2	<=60	Female	Stage II	T2	N0	M0	916	0
GSM2389717	5	＞60	Female	Stage III	T3	N0	M0	848	0
GSM2389718	3	<=60	Male	Stage IV	T3	N2	M0	210	1
GSM2389720	2	<=60	Male	Stage IV	T3	N1	M0	278	1
GSM2389721	3	<=60	Male	Stage IV	T3	N1	M0	416	1
GSM2389722	2	＞60	Female	Stage IV	T3	N1	M0	1168	0
GSM2389725	2	＞60	Male	Stage IV	T4	N1	M0	557	1
GSM2389726	3	<=60	Male	Stage III	T3	N0	M0	1037	0
GSM2389728	2	<=60	Female	Stage IV	T3	N1	M0	488	1
GSM2389729	2	<=60	Male	Stage III	T3	N0	M0	384	1
GSM2389730	3	＞60	Female	Stage IV	T1	N1	M0	523	0
GSM2389731	3	＞60	Female	Stage IV	T3	N0	M1	159	1
GSM2389734	3	＞60	Male	Stage II	T2	N0	M0	415	0
GSM2389735	3	<=60	Female	Stage II	T2	N0	M0	348	0
GSM2389738	1	<=60	Male	Stage IV	T2	N1	M1	341	1
GSM2389740	1	<=60	Male	Stage I	T1	N0	M0	2150	0
GSM2389741	3	＞60	Male	Stage IV	T4	N0	M0	1302	1
GSM2389742	3	<=60	Female	Stage I	T1	N0	M0	2255	0
GSM2389744	2	<=60	Female	Stage II	T2	N0	M0	2099	0
GSM2389746	2	<=60	Male	Stage IV	T4	N0	M0	154	1
GSM2389750	3	<=60	Female	Stage IV	T3	N1	M0	154	1
GSM2389752	3	<=60	Female	Stage III	T3	N0	M0	266	1
GSM2389753	2	＞60	Female	Stage IV	T4	N0	M0	228	1
GSM2389756	2	＞60	Male	Stage IV	T3	N1	M0	505	1
GSM2389757	4	<=60	Female	Stage IV	T4	N0	M0	1262	0
GSM2389758	5	<=60	Female	Stage IV	T3	N1	M1	232	0
GSM2389759	3	<=60	Male	Stage I	T1	N0	M0	982	0
GSM2389760	4	<=60	Female	Stage II	T2	N0	M0	357	0
GSM2389761	3	＞60	Female	Stage IV	T2	N1	M0	540	1
GSM2389763	1	＞60	Male	Stage II	T1	N0	M0	554	0
GSM2389764	3	<=60	Female	Stage I	T1	N0	M0	406	0
GSM2389773	7	＞60	Female	Stage IV	T3	N1	M0	1071	0
GSM2389774	2	＞60	Female	Stage III	T3	N0	M0	807	0
GSM2389775	3	<=60	Male	Stage IV	T3	N1	M0	296	1
GSM2389776	3	＞60	Male	Stage III	T3	N0	M0	168	0
GSM2389778	4	<=60	Female	Stage IV	T3	N0	M1	566	1
GSM2389782	5	<=60	Male	Stage II	T2	N0	M0	3114	0
GSM2389783	5	<=60	Male	Stage IV	T3	N1	M0	3217	0
GSM2389787	1	＞60	Male	Stage IV	T3	N1	M0	158	1
GSM2389789	4	＞60	Male	Stage I	T1	N0	M0	1924	0
GSM2389790	4	＞60	Female	Stage IV	T3	N1	M0	248	0
GSM2389793	5	<=60	Male	Stage IV	T4	N0	M0	1531	0
GSM2389797	3	＞60	Male	Stage I	T1	N0	M0	623	0
GSM2389798	3	<=60	Female	Stage III	T3	N0	M0	608	0
GSM2389800	2	＞60	Female	Stage IV	T1	N1	M0	69	1
GSM2389802	3	<=60	Male	Stage II	T2	N0	M0	532	1
TCGA-3X-AAV9	3	＞60	Male	Stage I	T1	N0	M0	339	1
TCGA-3X-AAVE	4	<=60	Male	Stage II	T2	N0	M0	650	0
TCGA-4G-AAZO	4	＞60	Female	Stage II	T2	N0	M0	1177	0
TCGA-4G-AAZT	4	＞60	Male	Stage I	T1	N0	M0	420	0
TCGA-W5-AA2G	5	＞60	Female	Stage I	T1	N0	M0	1976	0
TCGA-W5-AA2I	5	＞60	Male	Stage I	T1	N0	M0	1939	1
TCGA-W5-AA2O	4	<=60	Male	Stage I	T1	N0	M0	640	1
TCGA-W5-AA2Q	1	＞60	Male	Stage II	T2	N0	M0	50	0
TCGA-W5-AA2R	4	＞60	Female	Stage I	T1	N0	M0	1542	0
TCGA-W5-AA2T	6	＞60	Female	Stage II	T2	N0	M0	1220	1
TCGA-W5-AA2U	6	＞60	Female	Stage I	T1	N0	M0	627	1
TCGA-W5-AA2W	4	<=60	Female	Stage IV	T2	N1	M0	924	1
TCGA-W5-AA2Z	4	<=60	Female	Stage II	T2	N0	M0	1614	0
TCGA-W5-AA30	6	＞60	Male	Stage I	T1	N0	M0	1153	0
TCGA-W5-AA33	4	<=60	Male	Stage I	T1	N0	M0	1449	0
TCGA-W5-AA34	4	＞60	Female	Stage I	T1	N0	M0	555	0
TCGA-W5-AA38	4	<=60	Female	Stage I	T1	N0	M0	1471	0
TCGA-W5-AA39	3	＞60	Male	Stage II	T2	N0	M0	170	1
TCGA-ZD-A8I3	4	＞60	Female	Stage II	T2	N0	M0	169	0
TCGA-ZH-A8Y1	1	＞60	Female	Stage IV	T3	N1	M0	385	1
TCGA-ZH-A8Y4	4	<=60	Male	Stage I	T1	N0	M0	741	1
TCGA-ZH-A8Y5	5	＞60	Male	Stage IV	T3	N1	M1	1229	0
TCGA-ZH-A8Y6	3	<=60	Female	Stage I	T1	N0	M0	519	0
TCGA-ZH-A8Y8	3	＞60	Male	Stage I	T1	N0	M0	602	0
